# Supplementary material for: Cinobufagin targets POU6F1 to downregulate LINC01410-mediated proliferation and metastasis in osteosarcoma
Source: Research Square preprint supplement (doi:10.21203/rs.3.rs-7976755/v1), 2025-11-14
Supplement: Supplementary file 1 [file 1e31762c9ab72c55e99dd1c7.docx]

**Supplementary Table S1. Computationlly predicted Cinobufagin target genes**

| Gene ID | Gene Name | log2.FC. | P.Value |
| --- | --- | --- | --- |
| ENSG00000267147 | LINC01842 | -10.88 | 0.018741665957459 |
| ENSG00000204044 | SLC12A5-AS1 | -10.37 | 0.0000000001590693748 |
| ENSG00000267394 | ATXN7L3-AS1 | -5.59 | 0.00271058026009773 |
| ENSG00000258545 | RHOXF1-AS1 | -4.66 | 0.000407903165994072 |
| ENSG00000249406 | ENSG00000249406 | -3.52 | 0.0000403184493138668 |
| ENSG00000235865 | GSN-AS1 | -3.12 | 0.0066891965461336 |
| ENSG00000213888 | LINC01521 | -2.96 | 0.0426011488843391 |
| ENSG00000235180 | LINC00601 | -2.33 | 0.0173703372199758 |
| ENSG00000280604 | ENSG00000280604 | -2.25 | 0.0099431627362289 |
| ENSG00000230630 | DNM3OS | -2.21 | 0.036608311711707 |
| ENSG00000260920 | ENSG00000260920 | -2.01 | 0.0184453859375625 |
| ENSG00000262772 | LINC01977 | -2 | 0.0301371283074812 |
| ENSG00000274565 | ENSG00000274565 | -1.84 | 0.00729761446743542 |
| ENSG00000260597 | ENSG00000260597 | -1.65 | 0.00447112440289099 |
| ENSG00000277701 | ENSG00000277701 | -1.61 | 0.00632442441204504 |
| ENSG00000163364 | LINC01116 | -1.45 | 0.0347776161604746 |
| ENSG00000238113 | LINC01410 | -1.31 | 0.0373286374772916 |
| ENSG00000264207 | ENSG00000264207 | -1.24 | 0.000416138064541467 |

**Supplementary Table S2. Primer sequences for quantitative real time PCR**

| LINC00601 | F:CACTTACTGATTGAGCGTCCACTTG  R:CTTCCATGTGTTGCTGCTTCTAGTC |
| --- | --- |
| LNCATXN7L3-AS1 | F:TCGCTGCTGCTGTAATTCCTCTTG  R:GGCTTCCTCCCTGTTGGTGAAAC |
| LINC DNM3OS | F:TCCCAGAATGAGACAATGACCTAGC  R:GTTATCCTGGAGTGCCTCACCTTAG |
| LINC01521 | F:GAGGCAGGAGAATCGCTTGAACC  R:TGAGACGGAGTTTCGCTCTTGTTG |
| LINC01410 | F:ACAGCCCTGAGTGAAAAGTCC  R:ACAAGATGCCTTGGAGTGTCA |
| GAPDH | F:TCAAGAAGGTGGTGAAGCAGG  R:TCAAAGGTGGAGGAGTGGGT |
| LINC01410-promoter-site1 | F:TCGATCCCTGACCTACTCGG  R:GGAAGCAGAGGGTACGTGAC |
| LINC01410-promoter-site2 | F:CTCACTGTGGCAGGAGCAG  R:CTGGAATCAGGCAGGCGTAG |
| LINC01410-promoter-site3 | F:CACTACCACGAGCAAACCCA  R:GGAGGTCTCCCTTTGAGCTA |
| LINC01410-promoter-site4 | F:CAGCTACGCCTGCCTGATTC  R:GCGATGGTGGTGCTTGGG |
